# 1 **Accessory genes define species-specific** 2 **pathways to antibiotic resistance.**

3 **L. Dillon<sup>1</sup>, NJ. Dimonaco<sup>1,2,3</sup>, and CJ. Creevey<sup>1</sup>**

4 <sup>1</sup>**School of Biological Sciences, Queen's University Belfast, BT7 1NN, UK**

5 <sup>2</sup>**Department of Medicine, McMaster University, Hamilton, ON, Canada**

6 <sup>3</sup>**Farncombe Family Digestive Health Research Institute, McMaster University, Hamilton,**  
7 **ON, Canada**

## 8 **ABSTRACT**

### Background:

The rise of antimicrobial resistance (AMR) is a growing concern globally and a deeper understanding of AMR gene carriage vs usage is vital for future responses to reduce the spread of AMR. Identification of AMR phenotype by laboratory-based assays are often hindered by difficulties in establishing cultures. This issue could be resolved by rapid computational assessment of an organism's genome, however, AMR gene finder tools are not intended to infer AMR phenotype which is likely to be a product of multiple gene interactions.

### Methods:

To understand the importance of multi-gene interactions to the relationship between AMR genotype and AMR phenotype, we applied machine learning approaches to 16,950 genomes from microbial isolates representing 28 different genera with 1.2 million corresponding laboratory-determined MICs for 23 different antibiotics. We then elucidated the genomic paths to phenotypic antimicrobial resistance with the aim of allowing for the development of rapid determination of AMR phenotype from genomes or even whole microbiomes.

### Results:

The application of machine learning models resulted in a >1.5-fold increase in average prediction accuracy of AMR phenotype across the 23 antibiotic models. Interpretation of these models revealed 528 distinct genomic pathways to phenotypic resistance, many of which were species-specific and involved genes which have not previously been associated with AMR phenotype. This is the first study to demonstrate the utility of machine learning models in the prediction of AMR phenotype for a wide range of clinically relevant organisms and antibiotics. This could be applied as a rapid and affordable alternative to culture-based techniques, estimating taxonomy in addition to AMR phenotype, and providing real-time monitoring of multi-drug resistant pathogens.

### Availability and implementation:

Contact: [ldillon05@qub.ac.uk](mailto:ldillon05@qub.ac.uk)

View supplementary information at this link:

[https://osf.io/cj4bq/?view\\_only=c0ee87b7609543b688953089be4c376f](https://osf.io/cj4bq/?view_only=c0ee87b7609543b688953089be4c376f)

See Code Availability for scripts used.

Keywords: Machine learning, antimicrobial resistance, decision tree, logistic regression, precision, recall, MIC, EUCAST

## 9 **INTRODUCTION**

10 The overuse and misuse of antibiotics has escalated the rate at which many bacteria have evolved resistance  
11 to multiple antibiotics [9, 37], including last-resort treatments [2]. This has led to a growing prevalence  
12 of antimicrobial-resistant infections worldwide [27], which can be challenging to treat [7]. This has  
13 caused antimicrobial resistance (AMR) to become an increasing burden on society from a global health,  
14 agricultural and financial perspective [1, 20, 42]. If the rate of AMR continues as projected, it is estimated  
15 that by the year 2050, there will be > 10 million deaths annually as a result of AMR-related infections  
16 [26].

17 AMR phenotype is typically distinguished through laboratory-based approaches such as broth microdilution, E-tests or disk diffusion assays [4]. However, it typically takes 2-4 days to allow time to culture the  
18 bacteria and then complete the test [5]. More rapid testing is available through automated instruments for  
19 antibiotic susceptibility testing, such as commercial automated antimicrobial susceptibility tests (i.e. Vitek  
20 2 system and Microscan WalkAway) [4, 24] or isothermal microcalorimetry accurately determine MIC  
21 values (i.e. Symcel) [41], which is often used in hospital environments. However, while these assays are  
22 usually a good estimate of AMR phenotype in culture, this does not always translate to clinical settings.  
23 This is further complicated by the difficulty in culturing many organisms, especially when assessing  
24 species directly from microbiome samples [36]. Besides the importance of understanding the role of AMR  
25 phenotype in microbiomes from an AMR reservoir perspective [37], it also has the potential to reveal the  
26 mechanisms underpinning AMR-driven dysbiosis [31] within humans and animals and potentially aid us  
27 to prevent disease whilst concomitantly slowing the spread of AMR.  
28 Recently, computational methods to identify AMR-causing genes in genomic data have become widely  
29 available [6, 30, 19] and are often used to assess the potential antibiotic resistance phenotype of an  
30 organism [37] or even entire microbiomes [46]. These AMR gene finder tools run relatively quickly,  
31 especially compared to laboratory-based assays. Still, different tools can provide varying results [16],  
32 likely driven by differences in the databases that they use to detect AMR genes and the varying methods  
33 to extract the AMR genes [14]. AMR gene finder tools are also prone to error, for example, when closely  
34 related genes may be predicted as resistance genes incorrectly [5]. Very often microbiomes harbour AMR  
35 genes even when antibiotic usage is absent [28, 48, 18]. Why these bacteria harbour AMR genes within  
36 the microbiome is unclear. Several AMR genes have been reported to have alternative functions, such as  
37 transporters [11], yet this is not the case for all.  
38

39 Most importantly, AMR gene finder tools predictions represent what is likely in many cases to be  
40 a simplified concept of the mechanisms underpinning the presentation of AMR phenotype. There is  
41 the assumption that a single gene or mutation is responsible for the phenotypic expression of AMR and  
42 gene finder tools do not take into account other genes which may be required to confer resistance to an  
43 organism [25]. We refer to these non-classical AMR genes that are important to the presentation of AMR  
44 phenotype as “accessory” genes.

45 Some previous studies have attempted to use machine learning as a way of predicting the AMR phenotype  
46 from genotype [33, 34]. These studies have had several limitations such as only studying a specific  
47 species, and/or using a single antibiotic [32, 29, 45, 44] or using non-interpretable methods such as a  
48 neural network [3], thereby limiting our ability to understand the biological processes involved. Using  
49 a more interpretable method such as decision trees, applied to a wide range of taxa across multiple  
50 antibiotics has the potential to provide a unique biological understanding of antibiotic resistance and allow  
51 the identification of accessory genes associated with alternative “paths” to phenotypic resistance.

52 To address this, we determined the role of “accessory” genes in the presentation of an AMR phenotype.  
53 Our hypothesis is that focusing solely on classic AMR genes misses vital information needed to evaluate  
54 AMR phenotypes accurately. We address this through the application of multiple Machine Learning (ML)  
55 models to a dataset of 16,950 genomes from microbial isolates representing 28 different genera with 1.9  
56 million corresponding laboratory-determined MICs for 79 different antibiotics. This data was filtered by  
57 matching to EUCAST breakpoints and to ensure more balanced datasets according to AMR phenotype  
58 (see Methods and Materials: Data for Analysis for further details). We then elucidate the genomic paths  
59 (combinations of genes presence and absence to reach a phenotype) to phenotypic antimicrobial resistance  
60 that are shared or unique to species or antibiotics with the aim of allowing for the development of rapid  
61 determination of AMR phenotype from genomes or even whole microbiomes.

## 62 **METHODS AND MATERIALS**

63 All scripts and files mentioned in the text can be found at [https://github.com/LucyDillon/AMR\\_ML\\_paper/tree/main](https://github.com/LucyDillon/AMR_ML_paper/tree/main). This includes all bash scripts to analyse data using tools and details of  
64 how gene counts for RGI and Egnog gene families were calculated.  
65

66 Supplementary files and additional data can be found at: [https://osf.io/cj4bq/?view\\_only=c0ee87b7609543b688953089be4c376f](https://osf.io/cj4bq/?view_only=c0ee87b7609543b688953089be4c376f).  
67

## 68 **Data for Analysis**

69 Using the PATRIC command line interface (version 1.034 - now known as BV-BRC) [13, 35], 16,950  
70 bacterial genomes from isolates of known taxonomy with 1,249,188 corresponding laboratory-determined  
71 MIC values were sourced. The genomes used in this study can be found using a wget command called:  
72 PATRIC\_genomes.sh using the input: genome\_ids.txt. For each genome, the AMR genotype was deter-  
73 mined using the Resistance Gene Identifier (RGI) tool v5.1.1 [23] with the CARD database v3.1.1 [30]  
74 using the default parameters and the whole genome sequence from the genome as input. The CARD  
75 database includes acquired resistance and resistance due to mutations.  
76 Each predicted AMR gene in each genome was then associated with the specific antibiotic(s) to which  
77 it was listed as conferring resistance to using the information in the CARD database. The MIC values  
78 were categorised into ‘Susceptible’ or ‘Resistant’ using EUCAST breakpoints (Jan 2021 release) [15]  
79 which are taxonomic-specific MIC values that can differ between species. The MICs were categorised  
80 into the respective EUCAST breakpoints using custom Python scripts (OG\_RGI\_analysis.py, Logis-  
81 tic\_regression\_RGI.py, RGI\_specific\_analysis.py, RGI\_all\_analysis.py, and Eggnog\_analysis.py). Any MIC  
82 values that fell outside the EUCAST definition of “susceptible” or “resistant” for any specific species  
83 were removed from the analysis. In the case that a genome had >1 MIC values for the same antibiotic, the  
84 average was calculated and then compared to the EUCAST breakpoints. This resulted in 5,990 genomes,  
85 19 Genera, with 47,711 EUCAST classified MICs for subsequent analysis (28,480 resistant and 19,231  
86 susceptible MICs). Details of the number of each Genus for each antibiotic model can be found in  
87 Supplementary Table 1.

## 88 **Analysis of AMR genotype to phenotype relationship**

89 In this study, we used several techniques to further understand the relationship between AMR genotype  
90 and AMR phenotype. The models used are binary classifiers (either classifying as susceptible or resistant)  
91 which although makes for a simpler model, excludes the use of intermediate resistance or more complex  
92 conditions such as persistence or tolerance. To predict the AMR genes present within each genome, we  
93 used RGI, a commonly used AMR gene finder tool. We evaluated four phenotype prediction approaches  
94 using linked laboratory-determined resistance/susceptibility profiles against a range of antibiotics. We  
95 first tested a naive prediction of AMR phenotype using the presence/absence of AMR genes and the  
96 antibiotics to which the genes were listed as conferring resistance in the RGI database. Secondly, we  
97 tested the application of a basic logistic regression model to the AMR gene presence-absence data. Finally,  
98 we tested the application of four machine-learning approaches to predict AMR phenotype using gene  
99 counts of known AMR genes with and without gene counts of all other functionally annotated genes in the  
100 genomes (eggNOG gene families). Each of these approaches (further outlined below) was independently  
101 applied to the prediction of resistance to 23 different antibiotics for which relevant MICs were available.

## 102 **Naive prediction of AMR phenotype**

103 Although RGI and other AMR gene finder tools do not claim to be able to infer AMR phenotype, the  
104 presence of an AMR gene is often used to designate whether a genome is susceptible or resistant [40,  
105 6]. Therefore, the presence of an RGI-annotated AMR gene was used as an indicator of resistance to  
106 the antibiotic(s) to which the gene was labelled as resistant in the CARD database. Precision, recall  
107 and accuracy for both susceptible and resistant phenotypes were calculated for this naive model using a  
108 custom Python script (OG\_RGI\_analysis.py) as a baseline to compare the subsequent models.

## 109 **Logistic regression prediction of AMR phenotype**

110 To evaluate the relationship between the AMR genotype and AMR phenotype, a logistic regression model  
111 was used for each antibiotic (Fig.1) with a split of 3:1 between training and test datasets respectively,  
112 using a custom python script (Logistic\_regression\_RGI.py). This model evaluated how the presence or  
113 absence of specific AMR genes was related to the AMR phenotype. Model precision, recall and accuracy  
114 for both susceptible and resistant phenotypes were calculated to evaluate the model efficacy and potential  
115 bias. The ratio of susceptible organisms to resistant organisms can help determine the likelihood of bias  
116 in the training data (Fig.S1).

## 117 **Decision tree prediction of AMR phenotype using only AMR genes**

118 To understand how specific AMR genes may drive the relationship between the AMR phenotype and  
119 AMR genotype, 4 machine-learning approaches were used. A custom Python script was used to convert

120 the RGI gene counts into an Attribute-Relation File Format (ARFF) file (RGI\_specific\_analysis.py) and  
121 using the csv2arff tool found at [https://github.com/LucyDillon/CSV\\_2\\_arff](https://github.com/LucyDillon/CSV_2_arff). The J48  
122 decision tree models were built as implemented in the WEKA machine learning platform (version 3.8.5)  
123 [12]. The J48 model is written in Java and is an adaptation of the landmark C4.5 algorithm. In this  
124 analysis, the model takes into account the number of copies or absence of an AMR gene in relation to the  
125 AMR phenotype. J48 decision trees are used to classify each ‘instance’, or genome, based on the provided  
126 labels (AMR gene count). The model evaluates the data overall and then splits the genomes based on their  
127 labels (one label-based decision for each split). Next, it repeats this process on the subsets of genomes  
128 until the model has reached a preset limit based on either model parameters, such as the minimum number  
129 of genomes per split, or a consensus split of the correct categorical variable, in this case, AMR phenotype  
130 (further details below).

131 This analysis was then repeated using the Random Forest, Support Vector Machine (SVM - WEKA  
132 package: libsvm 3.25) and Logistic Model Trees (LMT) models in WEKA to compare the efficacy of  
133 each machine learning approach (Supplementary Table 2).

134 Models for 23 different antibiotics were selected with respect to various data constraints. Each model is  
135 trained specific to a single antibiotic and the genomes present in the model must have corresponding MIC  
136 values. For a model to be able to learn from the data and thus predict the correct AMR phenotype, the  
137 models had to have both susceptible and resistant organisms (Supplementary Table 3). The proportion of  
138 organisms with a susceptible to resistant MIC value can be seen in Fig.S1.

139 The J48 model was chosen for further analysis due to the interpretability of its decisions. Hence, providing  
140 the biological reasoning behind the predictions it made. The output of the J48 model is a human-readable  
141 tree of the decisions to partition the genomes (as resistant or susceptible) (Fig.S3-S5). The default  
142 parameters were used for the WEKA J48 model, however, the parameters were first evaluated by a matrix  
143 comparing M (Minimum number of instances per leaf) and C values (Confidence value: the lower value  
144 indicates more pruning) (Supplementary Table 4). There was no difference in eight of the antibiotic  
145 models using the different parameters and the rest of the models had minor differences. The most accurate  
146 C value could be found by using 0.25 or 0.5 for 15 out of 23 antibiotic models. The C value of 0.25 was  
147 selected as this level of tree pruning is recommended to not overfit the model or prune the tree too much  
148 and miss important information. The M value of 0.2 was selected as this is the default of the model and the  
149 other M values had very similar accuracy. The model accuracy was evaluated by 10-fold cross-validation.  
150 The individual fold results allowed the standard error of the models to be calculated (Supplementary Table  
151 3).

152 To evaluate what factors may impact the models or improve model accuracy, the composition of AMR  
153 genes used to train the models was analysed. The models were originally trained using specific AMR  
154 genes for the antibiotic the model represented. For example, Ampicillin-specific AMR genes to train the  
155 Ampicillin model. The antibiotic target is defined in the CARD database in which the genes are annotated  
156 to correspond to specific antibiotics. The models were then trained with all AMR genes present in the  
157 genomes regardless of which antibiotic model they were training (Supplementary Table 3, Supplementary  
158 Table 5, Fig.S2). A custom Python script used to make the .arff files for this analysis (RGI.all\_analysis.py).

### 159 **Investigating the role of taxonomy on decision tree model accuracy**

160 To investigate the role of taxonomy on model accuracy, for each antibiotic model, one genus was excluded  
161 from the training data. The excluded genus was then used to test the model. This included each genus  
162 available for each antibiotic model (see Supplementary Table 6 for details). This way we can evaluate  
163 how the models may perform on a species that was not in the training set. We used a custom python script  
164 to develop the .arff files (taxa\_test\_train\_files.py).

165 To process CSV files into the format required for weka (.arff) we created a simple tool to translate a .csv  
166 file into a .arff file. This code is freely available at [https://github.com/LucyDillon/CSV\\_2\\_](https://github.com/LucyDillon/CSV_2_arff)  
167 [arff](https://github.com/LucyDillon/CSV_2_arff).

### 168 **Analysis of accessory gene involvement in AMR phenotype**

169 To investigate the role of accessory genes in AMR phenotype, the genomes from BV-BRC were analysed  
170 using Prodigal v2.6.3 [21], Diamond v0.9.24.125 [8], and eggNOG-mapper version 2.1.6 to predict gene  
171 families [10]. All tools were used with default parameters. The least specific level of the eggNOG gene  
172 family (i.e. COG or NOG) was taken to get the most general result so that the gene families could be  
173 compared across different taxa. The number of genes present in a gene family, including their absence,

174 was compared with the genome AMR phenotype using the same J48 model and parameters in Weka,  
175 using a custom python script to make the .arff files (Eggnog\_analysis.py). A 10-fold cross-validation was  
176 used to evaluate the model's accuracy in predicting AMR phenotype, from which the standard error was  
177 calculated.

178 We mapped the RGI AMR genes onto the eggNOG decision tree models by analysing the CARD database  
179 with or eggNOG-mapper. The eggNOG gene families reported were matched to the AMR genes and were  
180 then labelled as having a known AMR gene function in the models. Finally, "pathways to resistance"  
181 were identified in all of the resulting decision tree models by identifying all possible paths through  
182 the resulting trees that lead to a "resistance" outcome, using Apply\_Decision\_Tree available at [https://github.com/ChrisCreevey/apply\\_decision\\_tree](https://github.com/ChrisCreevey/apply_decision_tree). All gene families traversed to reach  
183 each resistance outcome on the decision trees were considered important to that resistance path (regardless  
184 if it needed to be present or absent) and included in subsequent analyses of different paths to resistance.  
185

## 186 Investigating protein-protein interactions

187 Protein-protein interactions of the gene families within individual decision trees were investigated using  
188 the STRING protein-protein interaction database (version 11.5) [39]. One protein sequence from each  
189 gene family was selected (the first sequence in the fasta file downloaded from eggNOG for each gene  
190 family) to represent that gene family (723 unique gene families in total) using the "Protein families  
191 "COGs"" and "multiple sequences" options for each individual antibiotic model in STRING. This analysis  
192 was used to highlight if gene families within the same model or pathway to resistance were predicted to  
193 interact and therefore, may have a role together in AMR phenotype.

194 To find associations with the gene families across multiple models, STRING and Cytoscape (version 3.9.1)  
195 [38] were used to analyse the data using the same options as above, but including all gene families from  
196 all antibiotic models. To reduce the network to directly link to the decision trees, edges in the network  
197 were only retained if both gene families were present in the STRING protein-protein interactions (and  
198 therefore predicted to interact) and the pair was also present in at least one decision tree model. Details of  
199 this analysis can be found in the Cytoscape\_analysis.md file.

200 The predicted protein-protein interaction network of each path to resistance was also produced using  
201 STRING, but including only those gene families predicted for each individual path (allowing connections  
202 based on low confidence to provide further evidence that these putative connections which may not be  
203 well documented in the database may have a role in AMR phenotype). To investigate if pathways to AMR  
204 phenotype within the decision trees are taxonomically related, we traversed the decision trees to investigate  
205 which route each genome took for each model. This was performed using Apply\_Decision\_Tree using the  
206 same input genome .arff and dot files. DOT is a graph description language to visualise information, such  
207 as decision trees.

208 For all models, accuracy is defined by the sum of the true positives and true negatives divided by the sum  
209 of the total number of genomes (instances). Precision and recall of the models are calculated for both  
210 susceptible organisms and resistant organisms separately. This highlights whether a model is better at  
211 predicting one phenotype over another.

## 212 RESULTS

### 213 Machine Learning approaches accurately predict AMR Phenotype from AMR Genotype

214 Within this study, we analysed several techniques for predicting AMR phenotype from genomic data,  
215 including logistic regression of AMR genes, J48 decision tree models, Random Forest, Support Vector  
216 Machine (SVM), and Logistic Model Trees (LMT).

217 Even though AMR gene finder tools are designed to identify the presence of AMR genes in genomic  
218 data, their results are frequently used to directly infer AMR phenotype in literature [40, 6, 17, 43]. We  
219 examined the accuracy of predicting AMR phenotype solely based on the presence/absence of AMR  
220 genes for 23 antibiotics and 16,950 genomes, from organisms with laboratory-derived MIC data. This  
221 naive model assumed an antibiotic-resistant phenotype when an AMR gene which targeted a particular  
222 antibiotic as defined in the CARD database was found in a genome.

223 The average prediction accuracy of this model (as defined by the number of genomes correctly predicted to  
224 be susceptible or resistant to an antibiotic divided by the total number of genomes tested) was 57.6% and  
225 ranged from 3.5% (Clindamycin) to 100% (Moxifloxacin) (Fig.1). Clindamycin had quite a poor ratio of  
226 susceptible to resistant genomes (273:10) in comparison to moxifloxacin which was better proportioned to

227 make a more accurate model (4:10). The precision and recall were calculated using the confusion matrix  
228 (Supplementary Table 5, Supplementary Table 8). The average prediction precision was 56.2% and ranged  
229 from 46.3% (Fosfomycin) to 100.0% (Moxifloxacin) (Supplementary Table 8, Supplementary Table  
230 6). The average prediction recall for all 23 antibiotics was 61.2% and ranged from 24.6% (Ertapenem)  
231 to 100.0% (Moxifloxacin). Logistic regression models of the RGI genes had an average accuracy was  
232 73.9% and ranged from 50.96% (Erythromycin) to 97.44% (Amoxicillin) (Fig.S2), however, >50% of  
233 the models only predicted one phenotype, resulting in an average recall of 52.3% (ranging from 48.5%  
234 (Doripenem) to 75.0% (Amoxicillin)) and the average precision of 53.6% (ranging 31.5% (Doripenem) to  
235 74.5% (Erythromycin)) (Supplementary Table 3, Supplementary Table 8).  
236 As logistic regression did not result in good precision or recall for most models, we applied a decision  
237 tree approach (using the WEKA J48 model). The resulting decision tree models were highly accurate  
238 in predicting the correct AMR phenotype, when using 10-fold cross-validation the average accuracy  
239 was 91.1% and ranged from 74.85% (Tigecycline) to 100% (Moxifloxacin)(Fig.1, Supplementary Table  
240 3, Supplementary Table 10). The average recall of the RGI-specific decision tree models was 76.8%  
241 (ranging from 50.0% for Amoxicillin, Aztreonam, Clindamycin, Colistin, Fosfomycin, and Nitrofurantoin  
242 to 100.0% for Moxifloxacin). The average precision was 86.2% (ranging from 43.0% Colistin to 100.0%  
243 Moxifloxacin). Furthermore, traversal of the resulting decision trees indicated different genomic routes to  
244 resistance and susceptibility (see (Fig.2), highlighting the importance of both the presence and absence of  
245 multiple genes to predicting AMR phenotype from genomic data).  
246 The J48 model's average accuracy of 91.0% was comparable to Random Forests 92.0%, SVMs 86.3% and  
247 LMT 92.2% (Supplementary Table 2, Fig.S7) and had the advantage over the other models of allowing  
248 biological interpretation of the genes driving the AMR phenotype/genotype relationship. For this reason,  
249 we focussed further analysis on the decision tree models.

#### 250 **Model accuracy is not reliant on specific taxonomy.**

251 To investigate the ability of the decision-tree models to predict AMR phenotype for groups of organisms  
252 that were not included in the training data, for each antibiotic, we generated multiple sub-datasets where  
253 for each we excluded all genomes (and MIC data) from a selected genus from the training data and  
254 re-generated the model. The excluded genus and associated MIC data were then used to test the accuracy  
255 of the regenerated model for predicting AMR phenotype across taxonomic groups. The AMR phenotypes  
256 were predicted accurately given that both phenotypes were distributed evenly in the training data. Despite  
257 that the genomes are dominated by the Pseudomonadota phylum, the models were able to predict 100% of  
258 *Streptococcus* phenotype (Bacillota phylum). However, in the Ampicillin model, *Salmonella* phenotypes  
259 were not predicted well (34%). This may be due to a severe imbalance in phenotypes in the training  
260 data, meaning it incorrectly predicted *Salmonella* made from a biased model. Nevertheless, the average  
261 accuracy was 80.3% (ranging from 0% to 100 %) when trained on a different genus (Supplementary  
262 Table 6). *Klebsiella* had the most genomes for each antibiotic model and had relatively good accuracy  
263 (average accuracy 84.4%). However, in some cases, the genus with the second-largest number of genomes  
264 occasionally performed poorly for example, for Ampicillin *Salmonella* scored 34.3% but for Ciprofloxacin  
265 scored 97.7%. This may be due to some genera being more genetically similar than others, such as  
266 *Klebsiella* and *Escherichia* compared to *Nessieria*. To further investigate *Salmonella*, the results of  
267 the taxonomic analysis were compared to the tree traversals showing which different routes to AMR  
268 phenotype, this shed light on why *Salmonella* had high accuracy for Ceftriaxone, Ciprofloxacin, and  
269 Gentamicin but not Ampicillin. The tree traversal showed that in the models for Ceftriaxone, Ciprofloxacin,  
270 and Gentamicin the genera were very diverse and are not dominated by a singular genus. Yet, in the  
271 model for Ampicillin the tree traversal showed that the majority of the genomes were from *Salmonella*  
272 and every pathway contained *Salmonella* genomes. Therefore, when excluded from the training data the  
273 pathways for *Salmonella* will have also been excluded when building the model, hence when testing the  
274 accuracy is low.

#### 275 **ML models identify putative additional antibiotic targets of AMR genes.**

276 To investigate the role of AMR genes in antibiotic resistance to which they are not indicated in the CARD  
277 database, we generated decision trees which included all AMR genes regardless of the antibiotic target  
278 listed in the CARD database. This resulted in 17 antibiotic models improving in accuracy and overall  
279 significantly better compared to the models using only the AMR genes specific to the antibiotic which  
280 is listed in CARD (Wilcoxon signed rank test ( $q = 8.27E-04$ ) (Supplementary Table 11)). The average

281 accuracy was 92.5% (ranging from 79.7% (Tigecycline) to 100.0% (Moxifloxacin)) and the average recall  
 282 and precision were 83.5% (ranging from 50.0% (Fosfomycin) to 100.0% (Moxifloxacin)) and 87.5%  
 283 (ranging from 65.0% (Nitrofurantoin) to 100.0% (Moxifloxacin)), respectively (Supplementary Table 8).  
 284 A significant increase in average recall and precision was also observed (recall  $q = 4.39E-04$  and precision  
 285  $q = 0.04$ ) (Supplementary Table 11). This suggests that AMR genes may have additional antibiotic targets  
 286 not annotated in the databases. One example of this can be seen in the Gentamicin RGI-all model, which  
 287 shows the presence of  $> 1$  TEM-185 genes confer resistance to Gentamicin (Fig.S4). This particular gene  
 288 is not labelled to confer resistance to aminoglycoside antibiotics in the CARD database. We investigated if  
 289 the models were better at predicting one phenotype than the other, this can be inferred from Supplementary  
 290 Tables 5, 10, and 12 confusion matrices.

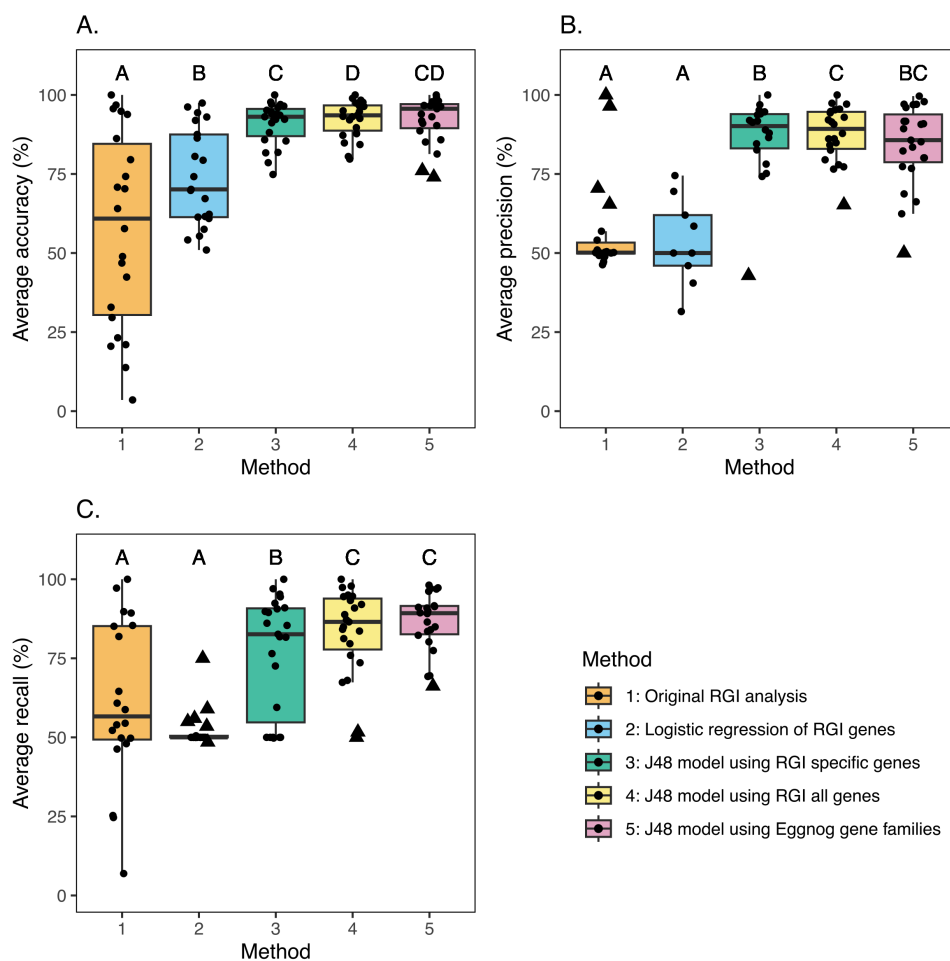

**Figure 1.** Model average accuracy (A), average precision (B) and average recall (C). The boxplots represent the following methods used in this study to predict AMR phenotype in the following order: Naive RGI analyses (orange), logistic regressions using the RGI data (blue), J48 decision trees using RGI genes specific to the antibiotic (green), J48 decision trees using all RGI genes regardless of the antibiotic model (yellow), J48 decision trees using Egnog gene families (pink). The statistical significances are the result of a pairwise Wilcoxon signed-rank test adjusted for multiple testing using the Benjamini-Hochberg method ( $q < 0.05$ ). No significant difference between distributions is indicated by a shared letter above their respective boxplot (see Supplementary Table 11 for more details). Outliers are represented with a triangle-shaped point.

291 **Accessory genes have a key role in AMR phenotype.**

292 To see if this observation extended to non-classic AMR genes, decision trees were generated for the 23  
 293 antibiotics using eggNOG gene family functional profiles generated for all 16,950 genomes. The average

294 accuracy for these models was 92.2% (ranging from 74.0% (Tigecycline) - 100.0% (Moxifloxacin)). In  
295 the comparison of the eggNOG models to the RGI models, the mean value was the highest for RGI all  
296 analysis (92.5%) (Supplementary Table 3, Supplementary Table 12). The difference between the RGI  
297 decision tree models and eggNOG gene families was not significant overall (RGI specific genes vs Egnog  
298  $q = 3.66E-01$ , RGI all genes models vs Egnog  $q = 2.49E-01$ ) (Supplementary Table 11). Overall, the  
299 eggNOG models were not significantly worse than the AMR gene-based decision trees, this highlights  
300 that the decision trees are able to extract key genes involved in AMR phenotype.  
301 The average precision of the eggNOG-based decision tree was 84.3% (ranging from 50.0% (Fosfomycin)  
302 to 100.0% (Moxifloxacin)) (Supplementary Table 8). This was significantly better than the logistic  
303 regression of RGI genes. This suggests that the models based on the eggNOG genes are less biased than  
304 the logistic regression and the RGI-specific analysis.  
305 The average recall of the eggNOG-based decision trees was 86.6% (ranging from 66.0% (Colistin)-100.0%  
306 (Moxifloxacin)) (Supplementary Table 8). This was significantly better than the naive RGI, the logistic  
307 regression and RGI-specific decision tree models.  
308 We can gain further biological insight by using these accessory genes which may be involved in resistance  
309 pathways. This could provide novel information about pathways to resistance to particular antibiotics.  
310 Using the eggNOG decision trees we found an additional 675 gene families across all 23 models which  
311 are not in the RGI database but are linked to the AMR phenotype.

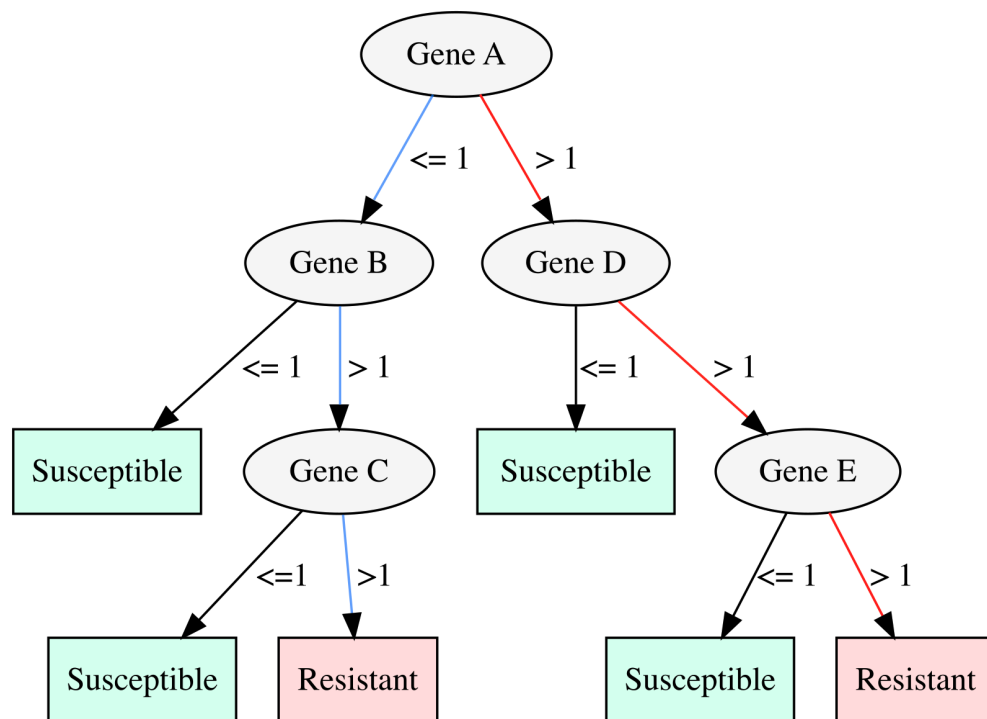

**Figure 2.** An example of a decision tree with two routes to resistance, indicated by the red and blue lines. For example, in the red pathway, if more than one copy of Gene A, D and E are present the genome will be resistant but if one of those genes is not present (i.e. Gene E) the organism will be susceptible.

### 312 **Decision trees show biological pathways to resistance.**

313 The use of decision trees allowed biological interpretation of (428 susceptible routes and 528 resistant  
314 routes in eggNOG models) paths to resistance and susceptibility (Fig.3 and Fig.S3-S5, Supplementary  
315 Table 13). The models showed the importance of the absence or number of copies of genes which could  
316 influence the AMR phenotype of an organism. The co-occurrence of genes was another important factor  
317 when determining the AMR phenotype. This highlights key genes involved in AMR phenotype that may  
318 not be classic AMR genes (Fig.S7). RGI genes were matched to the gene families in the decision tree  
319 models, we can see that the majority of models contained RGI gene families. In the eggNOG-based  
320 Amikacin model, COG0050 is matched to a multidrug-resistant gene (*Escherichia coli* acrA) but this is not



321 involving aminoglycoside suggesting that this gene may have additional targets. The Tetracycline decision  
322 tree model using eggNOG gene families shows there are 6 routes to resistance. The decision trees have  
323 values for each phenotype in the tree so the number of genomes reaching that route can be distinguished,  
324 this way the main routes to resistance are revealed (in the case in which there are two numbers, the first is  
325 the total number of genomes and the second is the number of incorrectly classified genomes). The most  
326 common route to resistance involves COG0480 and COG0765. The gene family COG0480 is a key gene  
327 family involved in Tetracycline resistance (tet(44)), Figure 3A shows that COG0765 does not have to be  
328 present for an organism to be resistant .

329 The analysis to link eggNOG gene families and RGI AMR genes revealed that most decision tree models  
330 had several gene families linked to RGI genes. However, the RGI gene families did not dominate the  
331 trees suggesting that accessory genes have an important role in AMR phenotype. The eggNOG-based  
332 decision tree using the Tetracycline phenotypic data had three gene families (tet(44), tetU, and adeS)  
333 associated with known AMR genes, yet their presence did not always guarantee resistance to tetracycline  
334 (Fig.3A). Therefore, the presence or absence of certain accessory genes was relied on to confer the  
335 resistant phenotype.

336 STRING was used to identify putative protein-protein interactions between genes within each decision  
337 tree model. Of the 23 models, 18 models contained COGs which were predicted to have protein-protein  
338 interactions, for example, co-occurrence and co-expression. The Tetracycline decision tree using eggNOG  
339 gene families showed that 63.6% of the gene families had protein connections in STRING (Fig.S9).  
340 Each pathway to resistance was analysed in STRING to calculate a network of the protein-protein  
341 interactions of how likely they are to interact based on confidence values. Across all models, each path  
342 to resistance had an average of 1.2 connections ranging from 0 to 7.6 (Supplementary Table 13). After  
343 investigating the pathways to AMR phenotypes within the decision trees, we found that many of the  
344 routes are taxonomically dependent. This is shown in all versions of the decision tree models (using  
345 AMR and accessory genes). In Figure 3A we can see 12 distinct routes to AMR phenotype, pathways  
346 4-6 are all classified as the *Neisseria* genus. Pathway 9 is classified as *Campylobacter* (99.4%) (Fig.3B).  
347 While this is not the case for every pathway in the trees (i.e. pathway 1 is very mixed) many of the  
348 branches in the trees could predict the taxonomy as precise as the species as well as the AMR phenotype.  
349 Additional antibiotic model pathways for species - phylum can be found in Fig.S8. Each pathway to  
350 resistance was investigated using the confidence values in STRING (including taxmining, Neighborhood,  
351 Gene Fusion, Experiments, Co-occurrence, Databases, and Co-expression), we can see in Figure3C the  
352 majority of pathways have multiple connections. Details on all other pathways to resistance can be found  
353 in Supplementary Table 13.

### 354 **Resistance pathways to different antibiotics are distinct from each other**

355 Using the decision trees we can work out which combinations of genes are involved in resistance (see  
356 example decision tree (Fig.2) for reference). Understanding which genes are key to resistance in particular  
357 antibiotics or shared across different antibiotics could help provide insight into novel approaches to  
358 combat AMR in the future. To investigate these key genes, we analysed every gene family present in  
359 every decision tree. The COG distribution across the different models was analysed and there were 723  
360 unique COGs in total for all the models. Of these unique COGs, 48 were linked to RGI AMR genes  
361 (Supplementary Table 14). The distribution of different COG functional categories was varied across all  
362 models, suggesting that resistance to different antibiotics has distinct mechanisms (Fig.S6).

363 To find connections between all the antibiotic models we found protein-protein interactions in STRING  
364 for all gene families from all decision tree models. The initial STRING network had 450 nodes and  
365 10,786 edges. This included all evidence types in STRING at a medium level of confidence (0.4). This  
366 was reduced to relate directly to the decision tree models by only including node pairs that had predicted  
367 protein-protein interactions in STRING and the same pair was also present in at least one decision tree.

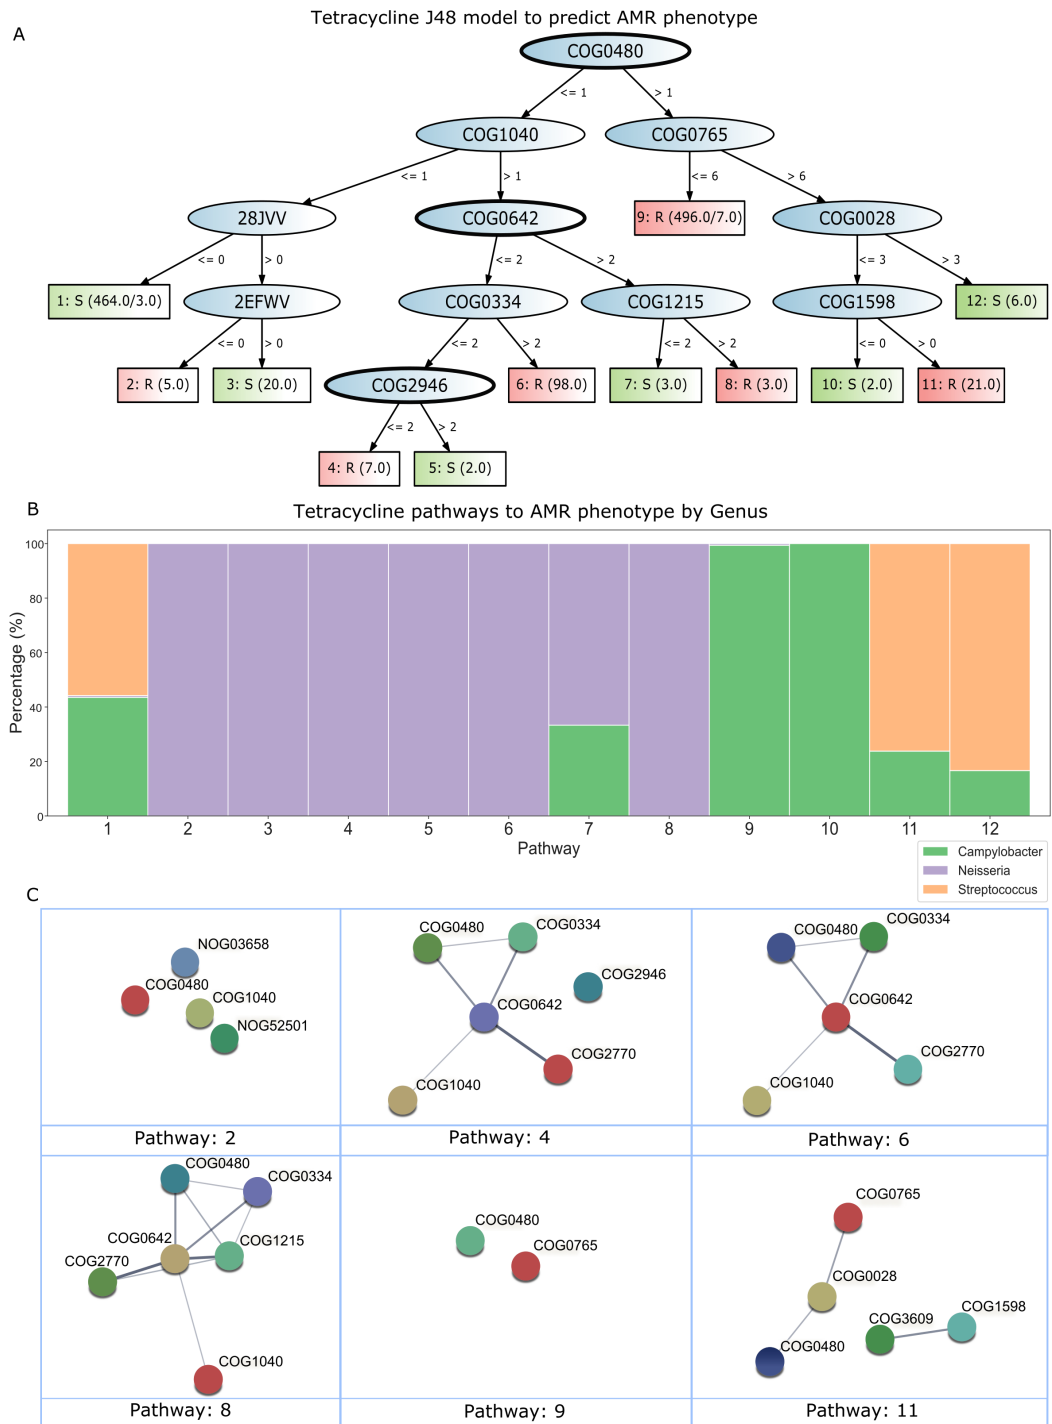

**Figure 3.** Predicting Tetracycline resistance using Eggnog gene families copy number or absence.

**A.** A J48 decision tree model to predict Tetracycline AMR phenotype. RGI-associated gene families have been highlighted with a thick black outline. COG0480 relates to gene tet(44), COG0642 relates to gene adeS, and COG2946 relates to gene tetU. The decision trees have numbers in the phenotype boxes to represent the number of genomes. This may include two numbers in some cases, the first number indicates the total number of genomes and the second number are incorrectly classified genomes.\*

**B.** Stacked bar chart showing the routes to susceptibility and resistance for Tetracycline. This is a genus level analysis, the species, family, order, class, and phylum analysis can be found in Fig.S8. The pathway numbers relate to the numbers on the decision tree (Part A). Note: pathway 9 is not 100% *Campylobacter*, 0.4% are *Neisseria*.

**C.** Protein-protein interactions between gene families for each pathway to resistance. The lines (edges) represent the protein-protein interactions from STRING and the thicker the line, the higher the confidence (see Supplementary Table 13 for details). See part A for details of each pathway (the pathway numbers correspond to the numbers on the phenotype boxes in part A).\* Note\*: COG 28JVV and 2EFVW are recognised as NOG03658 and NOG52501 in the STRING database, respectively.

368 The reduced network had 247 nodes and 1,300 edges, which showed clear clusters linking gene  
369 families to the specific antibiotic models (Fig.4). The network showed several gene families which  
370 connected to many different antibiotic gene clusters. This suggests these genes have an important role  
371 in AMR phenotype across multiple antibiotics. The most common gene family, COG2367 appeared  
372 in seven models. This is within the defence mechanisms group of eggNOG gene families, labelled as  
373 beta-lactamase. Interestingly, six of the models were built using the MICs of the beta-lactam antibiotics  
374 but COG2367 was also part of the Nitrofurantoin model which is distinct from the beta-lactam drug  
375 class. Within the Nitrofurantoin model, the COG2367 can have 4 copies of the gene family and still  
376 be susceptible (which according to the labels accounts for the majority of genomes on this pathway),  
377 if over 4 copies were present then there is a chance that the organism can be resistance. In the gene  
378 network, we can also see how different antibiotics have distinct genes which are only associated with that  
379 particular antibiotic (Fig.4, Fig.S10). This suggests that antibiotics have unique pathways to resistance.  
380 The network was clustered by antibiotic drug class, this showed that several drug classes were highly  
381 connected, including carbapenems and aminoglycosides (Fig.S11).

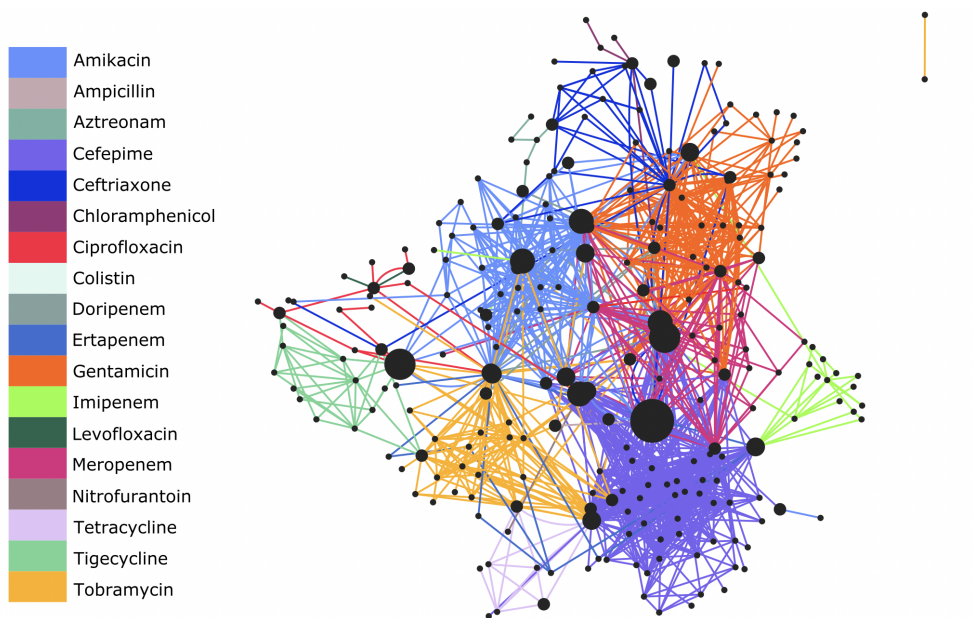

**Figure 4.** Gene network of all unique COGs across all antibiotic Egnog models. Nodes are the different COGs, edges are protein-protein interactions between COGs. The edges are coloured regarding the antibiotic model that the COG pair is present in. Node size is proportional to the number of models the COG is present in.

## 382 DISCUSSION

383 Within this study, we have shown that machine learning can vastly improve the prediction of AMR  
384 phenotype from genomic data. The consideration of accessory genes with AMR genes in these analyses  
385 provides valuable biological insights into the paths to AMR resistance and susceptibility.

386 The naive RGI model analysis shows that the presence of an AMR gene does not necessarily indicate the  
387 correct AMR phenotype. The average accuracy of RGI to predict AMR phenotype was 57.58%, which is  
388 comparable to a game of chance. The average precision was 56.2% and the average recall was 61.2%,  
389 which highlights key flaws in using the tool to predict AMR phenotype. While RGI is not designed  
390 to identify AMR phenotype but rather the AMR genotype, its results are often inferred as phenotypic  
391 resistance for genomes [40, 6, 17, 43] and metagenomes [22, 47].

392 Overall, while results from the logistic regression analysis was significantly better than those using  
393 RGI-only (Fig.1), it still underperformed which could suggest there is not enough data to make an accurate  
394 model, or there is not a strong enough link between the phenotype and the genes to be able to classify  
395 accurately using this approach. However, decision trees, show over 17% increase (statistically significant  
396  $q= 6.03E-05$ , Supplementary Table 11) in accuracy compared to logistic regression suggesting that the

397 poor performance of logistic regression may be due to the use of presence/absence information rather  
398 than the number of copies of genes, which the decision trees are capable of utilising.  
399 The decision trees have shown that it is both the presence (including the number of copies) and absence  
400 of different gene families that are key in the accurate prediction of AMR phenotype. Biologically this  
401 makes sense as we know that genes perform their function most often as an ensemble with other genes.  
402 The decision trees show that even when a known AMR gene is present, it does not necessarily mean that  
403 the organism is resistant (Fig.S3-S5). Interestingly the decision tree models which included AMR genes  
404 not thought to be involved in resistance to the antibiotics (RGI all models) being examined showed an  
405 increase in accuracy compared to the models which were generated using only those AMR genes known  
406 to provide resistance to the specific antibiotic. This suggests that many of the AMR genes within the  
407 CARD database may be involved in providing resistance to a broader range of antibiotics than what is  
408 annotated in the database. However, AMR genes may need additional genes present to confer resistance  
409 to particular antibiotics which is not identified in any commonly used AMR gene finder tool.  
410 The use of eggNOG gene families has shown the importance of accessory genes in the role of AMR  
411 phenotype. Accessory genes are generally ignored when determining the AMR phenotype of an organism  
412 when using computational techniques to predict AMR phenotype. Therefore, studies that rely on AMR  
413 gene finder tools to determine resistance could be misleading as the full picture is not described. All  
414 the eggNOG decision tree models are dominated by non-AMR genes (Fig.S5). The eggNOG models  
415 alongside the RGI models show that the presence of an AMR gene does not guarantee resistance to a  
416 particular antibiotic. Almost 30,000 gene families were used to train the eggNOG-based J48 models, in  
417 comparison, while 1,424 RGI AMR genes were used to train the RGI all-gene J48 models. The accuracy,  
418 precision and recall did not differ significantly between these models, this suggests that the J48 model  
419 is sufficient at extracting the most important factors involved in AMR phenotype. This is especially  
420 interesting as the eggNOG gene families are mostly not associated with AMR, unlike the RGI AMR genes  
421 which are defined in the CARD database to target particular antibiotic(s). Therefore, a lack of difference  
422 between the two datasets' accuracy, precision and recall indicates the importance of accessory genes.  
423 The precision and recall scores can be used to evaluate the model bias, using the values specific to the  
424 AMR phenotype. Therefore, we can evaluate if a model only predicts one phenotype well. The data shows  
425 that the average precision and recall for the logistic regression of the RGI genes were significantly worse  
426 than the majority of the decision tree models. The recall of the eggNOG models was not significantly  
427 different to the RGI all-gene analysis. The precision of the eggNOG models was not significantly different  
428 to both RGI decision trees. This suggests that the eggNOG models and the RGI models have a similar  
429 level of model bias despite the varying data input of the models (Supplementary Table 8).  
430 Analysing the gene family networks demonstrates that different antibiotics have clusters of genes relating  
431 to that specific antibiotic, suggesting that different antibiotics have distinct genes involved in pathways to  
432 resistance. Yet, the models are still connected to various gene families from other clusters, suggesting  
433 there are key non-AMR annotated genes involved across many antibiotic resistance mechanisms (Fig.4).  
434 Creating gene networks based on specific antibiotic models in addition to the overall network, highlighted  
435 the links between specific gene families in mechanisms to resistance for particular antibiotics. The network  
436 analysis for each path to resistance showed that many pathways to resistance have multiple connections.  
437 This shows that genes could be dependent on other genes to help confer a resistance phenotype.  
438 Identifying taxonomically dependent pathways to resistance within the decision trees highlights key genes  
439 to target for particular pathogens. Conversely, pathways to resistance with multiple taxa involved could  
440 suggest that the route is more transmissible resistance, which may provide opportunities for an easier  
441 target of resistance. These pathways also provide further biological insight into AMR mechanisms, many  
442 of which are understudied. Pathways dominated by one particular species but with other species present  
443 in small numbers could be indicators of horizontal gene transfer between species to confer resistance.  
444 Predicting the taxonomy in addition to the AMR phenotype will provide an additional function of the tool  
445 that these models are helping to create. More data and improvements would be needed to provide accurate  
446 predictions for greater taxonomic diversity. AMR phenotype cannot be clearly explained by the use of  
447 AMR gene finder tools alone. AMR gene finder tools may still provide a reasonable estimate for the AMR  
448 genotype of samples, yet to define specific AMR phenotypes a more detailed approach is required.  
449 The J48 models provide more biological insight than other machine learning techniques tested such as  
450 random forest, SVM, and LMT. For example, the Tetracycline model generated from eggNOG gene  
451 families identified 6 genotypic routes to phenotypic resistance. The main pathway to resistance involves

452 the presence and absence of two gene families, COG0480 and COG0765 (Fig.3). COG0480 is linked to  
453 an RGI gene (tet(44)), and COG0765 is in COG category P and involved in amino acid transport. Further  
454 work needs to be done in this area to investigate the role of the presence and absence of accessory genes  
455 and AMR phenotype.

## 456 **Summary**

457 We have shown that AMR phenotype can be accurately predicted using interpretable machine learning  
458 models such as decision trees that utilise both known AMR and accessory genes (eggNOG gene families)  
459 for multiple taxonomies, across multiple antibiotics. The use of AMR gene finder tools has repeatedly  
460 been shown to have limitations in their ability to predict AMR phenotype based solely on the presence of  
461 AMR genes. The use of machine learning techniques in this study has shown the benefit of analysing dif-  
462 ferent factors, such as gene counts and absence, as key factors together when predicting AMR phenotype.  
463 Equally, we have also highlighted that the role of accessory genes in AMR phenotype is understudied  
464 in relation to AMR. Building models with the near-complete functional capacity of a genome showed  
465 accessory genes are fundamental to resistance. Finally, this study demonstrates the complexity of the  
466 AMR phenotype in relation to its genome but it has also highlighted that there are routes to resistance that  
467 are taxonomically dependent.

468 These machine learning approaches have the potential to transform laboratory-based diagnostics, provid-  
469 ing a rapid and affordable alternative to culture-based techniques, estimating taxonomy in addition to  
470 AMR phenotype, and providing real-time monitoring of multi-drug resistant pathogens.

471  
472 A call for data: If you would like to be involved in improving these models by contributing genomes  
473 with corresponding MIC (micro broth dilution) data please contact us at: [ldillon05@qub.ac.uk](mailto:ldillon05@qub.ac.uk).

## 474 **ACKNOWLEDGMENTS**

475 We acknowledge funding from the Department for Economy Northern Ireland for PhD funding for  
476 L.D. C.J.C. wishes to acknowledge funding from the European Commission via Horizon 2020 (818368,  
477 MASTER and 101000213 HoloRuminant). N.J.D. wishes to acknowledge the Farncombe Digestive  
478 Health Disease Institute (McMaster University) and a grant from the Weston Family Microbiome Initiative.  
479 This work was undertaken on Kelvin2, an EPSRC-funded tier-2 High-Performance Computing facility at  
480 Queen's University Belfast, UK.

## 481 **AUTHOR CONTRIBUTIONS**

482 **LD** Carried out the data analysis, writing of the code on the AMR\_ML\_paper and CSV\_2\_arff GitHub.

483 **NJD** Advised on using ML and review of manuscript and methods.

484 **CJC** Tree traversal code and direction of scientific discovery and reporting.

485 All authors contributed to the scientific direction and writing of the manuscript.

## 486 **DATA AVAILABILITY**

487 All supplementary data and additional files can be found here: [https://osf.io/cj4bq/?view\\_](https://osf.io/cj4bq/?view_only=c0ee87b7609543b688953089be4c376f)  
488 [only=c0ee87b7609543b688953089be4c376f](https://osf.io/cj4bq/?view_only=c0ee87b7609543b688953089be4c376f). For specific files please email [ldillon05@qub.ac.uk](mailto:ldillon05@qub.ac.uk).

## 489 **CODE AVAILABILITY**

490 All code used in this study can be found at the following links:

491 [https://github.com/LucyDillon/AMR\\_ML\\_paper/tree/main](https://github.com/LucyDillon/AMR_ML_paper/tree/main)

492 [https://github.com/LucyDillon/CSV\\_2\\_arff](https://github.com/LucyDillon/CSV_2_arff)

493 [https://github.com/ChrisCreevey/apply\\_decision\\_tree/tree/master](https://github.com/ChrisCreevey/apply_decision_tree/tree/master)

## 494 **REFERENCES**

495 [1] *10 global health issues to track in 2021*. en. URL: [https://www.who.int/news-](https://www.who.int/news-room/spotlight/10-global-health-issues-to-track-in-2021)  
496 [room/spotlight/10-global-health-issues-to-track-in-2021](https://www.who.int/news-room/spotlight/10-global-health-issues-to-track-in-2021) (visited  
497 on 12/13/2022).

- 498 [2] Bruno G. N. Andrade et al. “Putative mobilized colistin resistance genes in the human gut mi-  
499 crobiome”. In: *BMC Microbiology* 21.1 (July 2021), p. 220. ISSN: 1471-2180. DOI: 10.1186/  
500 s12866-021-02281-4. URL: [https://doi.org/10.1186/s12866-021-02281-](https://doi.org/10.1186/s12866-021-02281-4)  
501 4 (visited on 10/13/2022).
- 502 [3] Ekaterina Avershina et al. “AMR-Diag: Neural network based genotype-to-phenotype prediction of  
503 resistance towards  $\beta$ -lactams in *Escherichia coli* and *Klebsiella pneumoniae*”. en. In: *Computational*  
504 *and Structural Biotechnology Journal* 19 (Jan. 2021), pp. 1896–1906. ISSN: 2001-0370. DOI:  
505 10.1016/j.csbj.2021.03.027. URL: [https://www.sciencedirect.com/](https://www.sciencedirect.com/science/article/pii/S2001037021000994)  
506 [science/article/pii/S2001037021000994](https://www.sciencedirect.com/science/article/pii/S2001037021000994) (visited on 01/04/2023).
- 507 [4] Alex van Belkum et al. “Innovative and rapid antimicrobial susceptibility testing systems”. en.  
508 In: *Nature Reviews Microbiology* 18.5 (May 2020). Number: 5 Publisher: Nature Publishing  
509 Group, pp. 299–311. ISSN: 1740-1534. DOI: 10.1038/s41579-020-0327-x. URL: <https://www.nature.com/articles/s41579-020-0327-x>  
510 (visited on 10/13/2022).
- 511 [5] Fanny Berglund et al. “Identification and reconstruction of novel antibiotic resistance genes  
512 from metagenomes”. In: *Microbiome* 7.1 (Apr. 2019), p. 52. ISSN: 2049-2618. DOI: 10.1186/  
513 s40168-019-0670-1. URL: <https://doi.org/10.1186/s40168-019-0670-1>  
514 (visited on 10/13/2022).
- 515 [6] Valeria Bortolaia et al. “ResFinder 4.0 for predictions of phenotypes from genotypes”. In: *Journal*  
516 *of Antimicrobial Chemotherapy* 75.12 (Dec. 2020), pp. 3491–3500. ISSN: 0305-7453. DOI: 10.  
517 1093/jac/dkaa345. URL: <https://doi.org/10.1093/jac/dkaa345> (visited on  
518 10/13/2022).
- 519 [7] Asher Brauner et al. “Distinguishing between resistance, tolerance and persistence to antibiotic  
520 treatment”. en. In: *Nature Reviews Microbiology* 14.5 (May 2016). Number: 5 Publisher: Nature  
521 Publishing Group, pp. 320–330. ISSN: 1740-1534. DOI: 10.1038/nrmicro.2016.34. URL:  
522 <https://www.nature.com/articles/nrmicro.2016.34> (visited on 10/13/2022).
- 523 [8] Benjamin Buchfink, Chao Xie, and Daniel H. Huson. “Fast and sensitive protein alignment using  
524 DIAMOND”. en. In: *Nature Methods* 12.1 (Jan. 2015). Number: 1 Publisher: Nature Publishing  
525 Group, pp. 59–60. ISSN: 1548-7105. DOI: 10.1038/nmeth.3176. URL: [https://www.](https://www.nature.com/articles/nmeth.3176)  
526 [nature.com/articles/nmeth.3176](https://www.nature.com/articles/nmeth.3176) (visited on 10/14/2022).
- 527 [9] Mitchell K. Byrne et al. “The drivers of antibiotic use and misuse: the development and investigation  
528 of a theory driven community measure”. In: *BMC Public Health* 19.1 (Oct. 2019), p. 1425. ISSN:  
529 1471-2458. DOI: 10.1186/s12889-019-7796-8. URL: [https://doi.org/10.1186/](https://doi.org/10.1186/s12889-019-7796-8)  
530 [s12889-019-7796-8](https://doi.org/10.1186/s12889-019-7796-8) (visited on 10/13/2022).
- 531 [10] Carlos P. Cantalapiedra et al. “eggNOG-mapper v2: Functional Annotation, Orthology Assignments,  
532 and Domain Prediction at the Metagenomic Scale”. eng. In: *Molecular Biology and Evolution*  
533 38.12 (Dec. 2021), pp. 5825–5829. ISSN: 1537-1719. DOI: 10.1093/molbev/msab293.
- 534 [11] Noémie Alon Cudkowicz and Shimon Schuldiner. “Deletion of the major *Escherichia coli* multidrug  
535 transporter AcrB reveals transporter plasticity and redundancy in bacterial cells”. en. In: *PLOS*  
536 *ONE* 14.6 (June 2019). Publisher: Public Library of Science, e0218828. ISSN: 1932-6203. DOI: 10.  
537 1371/journal.pone.0218828. URL: [https://journals.plos.org/plosone/](https://journals.plos.org/plosone/article?id=10.1371/journal.pone.0218828)  
538 [article?id=10.1371/journal.pone.0218828](https://journals.plos.org/plosone/article?id=10.1371/journal.pone.0218828) (visited on 01/26/2023).
- 539 [12] *Data Mining: Practical Machine Learning Tools and Techniques*. en. Elsevier, 2011. ISBN: 978-  
540 0-12-374856-0. DOI: 10.1016/C2009-0-19715-5. URL: [https://linkinghub.](https://linkinghub.elsevier.com/retrieve/pii/C20090197155)  
541 [elsevier.com/retrieve/pii/C20090197155](https://linkinghub.elsevier.com/retrieve/pii/C20090197155) (visited on 10/13/2022).
- 542 [13] James J Davis et al. “The PATRIC Bioinformatics Resource Center: expanding data and analysis  
543 capabilities”. In: *Nucleic Acids Research* 48.D1 (Jan. 2020), pp. D606–D612. ISSN: 0305-1048.  
544 DOI: 10.1093/nar/gkz943. URL: <https://doi.org/10.1093/nar/gkz943>  
545 (visited on 10/13/2022).
- 546 [14] Enrique Doster et al. “MEGARes 2.0: a database for classification of antimicrobial drug, biocide  
547 and metal resistance determinants in metagenomic sequence data”. eng. In: *Nucleic Acids Research*  
548 48.D1 (Jan. 2020), pp. D561–D569. ISSN: 1362-4962. DOI: 10.1093/nar/gkz1010.

- 549 [15] *euca*st: *Clinical breakpoints and dosing of antibiotics*. URL: [https://www.eucast.org/](https://www.eucast.org/clinical_breakpoints)  
550 [clinical\\_breakpoints](https://www.eucast.org/clinical_breakpoints) (visited on 10/16/2022).
- 551 [16] Michael Feldgarden et al. “Validating the AMRFinder Tool and Resistance Gene Database by  
552 Using Antimicrobial Resistance Genotype-Phenotype Correlations in a Collection of Isolates”. eng.  
553 In: *Antimicrobial Agents and Chemotherapy* 63.11 (Nov. 2019), e00483–19. ISSN: 1098-6596. DOI:  
554 10.1128/AAC.00483-19.
- 555 [17] Alfred Ferrer Florensa et al. “ResFinder – an open online resource for identification of antimicrobial  
556 resistance genes in next-generation sequencing data and prediction of phenotypes from genotypes”.  
557 In: *Microbial Genomics* 8.1 (Jan. 2022), p. 000748. ISSN: 2057-5858. DOI: 10.1099/mgen.0.  
558 000748. URL: <https://www.ncbi.nlm.nih.gov/pmc/articles/PMC8914360/>  
559 (visited on 02/17/2023).
- 560 [18] Chhedi Lal Gupta et al. “Longitudinal study on the effects of growth-promoting and therapeutic  
561 antibiotics on the dynamics of chicken cloacal and litter microbiomes and resistomes”. In: *Micro-*  
562 *biome* 9.1 (Aug. 2021), p. 178. ISSN: 2049-2618. DOI: 10.1186/s40168-021-01136-4.  
563 URL: <https://doi.org/10.1186/s40168-021-01136-4> (visited on 10/14/2022).
- 564 [19] Martin Hunt et al. “ARIBA: rapid antimicrobial resistance genotyping directly from sequencing  
565 reads”. In: *Microbial Genomics* 3.10 (Sept. 2017), e000131. ISSN: 2057-5858. DOI: 10.1099/  
566 mgen.0.000131. URL: [https://www.ncbi.nlm.nih.gov/pmc/articles/](https://www.ncbi.nlm.nih.gov/pmc/articles/PMC5695208/)  
567 [PMC5695208/](https://www.ncbi.nlm.nih.gov/pmc/articles/PMC5695208/) (visited on 10/13/2022).
- 568 [20] Sharon A. Huws et al. “Addressing Global Ruminant Agricultural Challenges Through Understand-  
569 ing the Rumen Microbiome: Past, Present, and Future”. In: *Frontiers in Microbiology* 9 (2018).  
570 ISSN: 1664-302X. URL: [https://www.frontiersin.org/articles/10.3389/  
571 fmicb.2018.02161](https://www.frontiersin.org/articles/10.3389/fmicb.2018.02161) (visited on 10/13/2022).
- 572 [21] Doug Hyatt et al. “Prodigal: prokaryotic gene recognition and translation initiation site identifica-  
573 tion”. In: *BMC Bioinformatics* 11.1 (Mar. 2010), p. 119. ISSN: 1471-2105. DOI: 10.1186/1471-  
574 2105-11-119. URL: <https://doi.org/10.1186/1471-2105-11-119> (visited on  
575 10/14/2022).
- 576 [22] Paul Jankowski et al. “Metagenomic community composition and resistome analysis in a full-scale  
577 cold climate wastewater treatment plant”. In: *Environmental Microbiome* 17 (Jan. 2022), p. 3. ISSN:  
578 2524-6372. DOI: 10.1186/s40793-022-00398-1. URL: [https://www.ncbi.nlm.  
579 nih.gov/pmc/articles/PMC8760730/](https://www.ncbi.nlm.nih.gov/pmc/articles/PMC8760730/) (visited on 01/20/2023).
- 580 [23] Baofeng Jia et al. “CARD 2017: expansion and model-centric curation of the comprehensive  
581 antibiotic resistance database”. In: *Nucleic Acids Research* 45.D1 (Jan. 2017), pp. D566–D573.  
582 ISSN: 0305-1048. DOI: 10.1093/nar/gkw1004. URL: [https://doi.org/10.1093/  
583 nar/gkw1004](https://doi.org/10.1093/nar/gkw1004) (visited on 10/13/2022).
- 584 [24] Ayesha Khan et al. “Evaluation of the Vitek 2, Phoenix, and MicroScan for Antimicrobial Sus-  
585 ceptibility Testing of *Stenotrophomonas maltophilia*”. en. In: *Journal of Clinical Microbiology*  
586 59.9 (Aug. 2021). Ed. by Patricia J. Simner, e00654–21. ISSN: 0095-1137, 1098-660X. DOI:  
587 10.1128/JCM.00654-21. URL: [https://journals.asm.org/doi/10.1128/  
588 JCM.00654-21](https://journals.asm.org/doi/10.1128/JCM.00654-21) (visited on 07/18/2023).
- 589 [25] Jolinda de Korne-Elenbaas et al. “The *Neisseria gonorrhoeae* Accessory Genome and Its Associa-  
590 tion with the Core Genome and Antimicrobial Resistance”. In: *Microbiology Spectrum* 10.3 (May  
591 2022). Publisher: American Society for Microbiology, e02654–21. DOI: 10.1128/spectrum.  
592 02654-21. URL: [https://journals.asm.org/doi/10.1128/spectrum.02654-  
593 21](https://journals.asm.org/doi/10.1128/spectrum.02654-21) (visited on 01/04/2023).
- 594 [26] Manoj Kumar et al. “Futuristic Non-antibiotic Therapies to Combat Antibiotic Resistance: A  
595 Review”. In: *Frontiers in Microbiology* 12 (2021). ISSN: 1664-302X. URL: [https://www.  
596 frontiersin.org/articles/10.3389/fmicb.2021.609459](https://www.frontiersin.org/articles/10.3389/fmicb.2021.609459) (visited on 10/13/2022).
- 597 [27] Jennie H. Kwon and William G. Powderly. “The post-antibiotic era is here”. In: *Science* 373.6554  
598 (July 2021). Publisher: American Association for the Advancement of Science, pp. 471–471. DOI:  
599 10.1126/science.ab15997. URL: [https://www.science.org/doi/10.1126/  
600 science.ab15997](https://www.science.org/doi/10.1126/science.ab15997) (visited on 12/13/2022).

- 601 [28] Tao Ma et al. “Expressions of resistome is linked to the key functions and stability of active  
602 rumen microbiome”. In: *Animal Microbiome* 4.1 (June 2022), p. 38. ISSN: 2524-4671. DOI:  
603 10.1186/s42523-022-00189-6. URL: [https://doi.org/10.1186/s42523-](https://doi.org/10.1186/s42523-022-00189-6)  
604 022-00189-6 (visited on 10/13/2022).
- 605 [29] Nenad Macesic et al. “Predicting Phenotypic Polymyxin Resistance in *Klebsiella pneumoniae*  
606 through Machine Learning Analysis of Genomic Data”. In: *mSystems* 5.3 (May 2020). Publisher:  
607 American Society for Microbiology, 10.1128/msystems.00656-19. DOI: 10.1128/msystems.  
608 00656-19. URL: [https://journals.asm.org/doi/10.1128/mSystems.00656-](https://journals.asm.org/doi/10.1128/mSystems.00656-19)  
609 19 (visited on 06/06/2023).
- 610 [30] Andrew G. McArthur et al. “The comprehensive antibiotic resistance database”. eng. In: *Antimicrobial Agents and Chemotherapy* 57.7 (July 2013), pp. 3348–3357. ISSN: 1098-6596. DOI:  
611 10.1128/AAC.00419-13.  
612
- 613 [31] Jun Miyoshi et al. “Peripartum Antibiotics Promote Gut Dysbiosis, Loss of Immune Tolerance,  
614 and Inflammatory Bowel Disease in Genetically Prone Offspring”. eng. In: *Cell Reports* 20.2 (July  
615 2017), pp. 491–504. ISSN: 2211-1247. DOI: 10.1016/j.celrep.2017.06.060.
- 616 [32] Marcus Nguyen et al. “Developing an in silico minimum inhibitory concentration panel test  
617 for *Klebsiella pneumoniae*”. en. In: *Scientific Reports* 8.1 (Jan. 2018). Number: 1 Publisher:  
618 Nature Publishing Group, p. 421. ISSN: 2045-2322. DOI: 10.1038/s41598-017-18972-w.  
619 URL: <https://www.nature.com/articles/s41598-017-18972-w> (visited on  
620 01/04/2023).
- 621 [33] Marcus Nguyen et al. “Predicting antimicrobial resistance using conserved genes”. en. In: *PLOS*  
622 *Computational Biology* 16.10 (Oct. 2020). Publisher: Public Library of Science, e1008319. ISSN:  
623 1553-7358. DOI: 10.1371/journal.pcbi.1008319. URL: [https://journals.plos.](https://journals.plos.org/ploscompbiol/article?id=10.1371/journal.pcbi.1008319)  
624 [org/ploscompbiol/article?id=10.1371/journal.pcbi.1008319](https://journals.plos.org/ploscompbiol/article?id=10.1371/journal.pcbi.1008319) (visited on  
625 01/04/2023).
- 626 [34] Marcus Nguyen et al. “Using Machine Learning To Predict Antimicrobial MICs and Associated  
627 Genomic Features for Nontyphoidal Salmonella”. eng. In: *Journal of Clinical Microbiology* 57.2  
628 (Feb. 2019), e01260–18. ISSN: 1098-660X. DOI: 10.1128/JCM.01260-18.
- 629 [35] Robert D. Olson et al. “Introducing the Bacterial and Viral Bioinformatics Resource Center (BV-  
630 BRC): a resource combining PATRIC, IRD and ViPR”. eng. In: *Nucleic Acids Research* (Nov.  
631 2022), gkac1003. ISSN: 1362-4962. DOI: 10.1093/nar/gkac1003.
- 632 [36] Frédéric Raymond et al. “Culture-enriched human gut microbiomes reveal core and accessory  
633 resistance genes”. In: *Microbiome* 7.1 (Apr. 2019), p. 56. ISSN: 2049-2618. DOI: 10.1186/  
634 s40168-019-0669-7. URL: <https://doi.org/10.1186/s40168-019-0669-7>  
635 (visited on 10/13/2022).
- 636 [37] Yasmin Neves Vieira Sabino et al. “Characterization of antibiotic resistance genes in the species of  
637 the rumen microbiota”. en. In: *Nature Communications* 10.1 (Nov. 2019). Number: 1 Publisher:  
638 Nature Publishing Group, p. 5252. ISSN: 2041-1723. DOI: 10.1038/s41467-019-13118-0.  
639 URL: <https://www.nature.com/articles/s41467-019-13118-0> (visited on  
640 10/14/2022).
- 641 [38] Paul Shannon et al. “Cytoscape: A Software Environment for Integrated Models of Biomolecular  
642 Interaction Networks”. In: *Genome Research* 13.11 (Nov. 2003), pp. 2498–2504. ISSN: 1088-  
643 9051. DOI: 10.1101/gr.1239303. URL: [https://www.ncbi.nlm.nih.gov/pmc/](https://www.ncbi.nlm.nih.gov/pmc/articles/PMC403769/)  
644 [articles/PMC403769/](https://www.ncbi.nlm.nih.gov/pmc/articles/PMC403769/) (visited on 10/14/2022).
- 645 [39] B. Snel et al. “STRING: a web-server to retrieve and display the repeatedly occurring neighbour-  
646 hood of a gene”. In: *Nucleic Acids Research* 28.18 (Sept. 2000), pp. 3442–3444. ISSN: 0305-1048.  
647 URL: <https://www.ncbi.nlm.nih.gov/pmc/articles/PMC110752/> (visited on  
648 10/14/2022).



- 649 [40] Shaoyuan Tan et al. “MinION sequencing of *Streptococcus suis* allows for functional charac-  
650 terization of bacteria by multilocus sequence typing and antimicrobial resistance profiling”. en.  
651 In: *Journal of Microbiological Methods* 169 (Feb. 2020), p. 105817. ISSN: 0167-7012. DOI:  
652 10.1016/j.mimet.2019.105817. URL: [https://www.sciencedirect.com/  
653 science/article/pii/S0167701219310152](https://www.sciencedirect.com/science/article/pii/S0167701219310152) (visited on 01/26/2023).
- 654 [41] C. Tellapragada et al. “Isothermal microcalorimetry minimal inhibitory concentration testing in  
655 extensively drug resistant Gram-negative bacilli: a multicentre study”. en. In: *Clinical Microbiology  
656 and Infection* 26.10 (Oct. 2020), 1413.e1–1413.e7. ISSN: 1198-743X. DOI: 10.1016/j.cmi.  
657 2020.01.026. URL: [https://www.sciencedirect.com/science/article/  
658 pii/S1198743X20300513](https://www.sciencedirect.com/science/article/pii/S1198743X20300513) (visited on 07/18/2023).
- 659 [42] Margo VanOeffelen et al. “A genomic data resource for predicting antimicrobial resistance from  
660 laboratory-derived antimicrobial susceptibility phenotypes”. eng. In: *Briefings in Bioinformatics*  
661 22.6 (Nov. 2021), bbab313. ISSN: 1477-4054. DOI: 10.1093/bib/bbab313.
- 662 [43] Tess Verschuuren et al. “External validation of WGS-based antimicrobial susceptibility prediction  
663 tools, KOVER-AMR and ResFinder 4.1, for *Escherichia coli* clinical isolates”. en. In: *Clinical  
664 Microbiology and Infection* 28.11 (Nov. 2022), pp. 1465–1470. ISSN: 1198-743X. DOI: 10.1016/  
665 j.cmi.2022.05.024. URL: [https://www.sciencedirect.com/science/  
666 article/pii/S1198743X2200283X](https://www.sciencedirect.com/science/article/pii/S1198743X2200283X) (visited on 02/17/2023).
- 667 [44] Shuyi Wang et al. “A Practical Approach for Predicting Antimicrobial Phenotype Resistance  
668 in *Staphylococcus aureus* Through Machine Learning Analysis of Genome Data”. In: *Frontiers  
669 in Microbiology* 13 (2022). ISSN: 1664-302X. URL: [https://www.frontiersin.org/  
670 articles/10.3389/fmicb.2022.841289](https://www.frontiersin.org/articles/10.3389/fmicb.2022.841289) (visited on 06/06/2023).
- 671 [45] Muhammad Yasir et al. “Application of Decision-Tree-Based Machine Learning Algorithms  
672 for Prediction of Antimicrobial Resistance”. en. In: *Antibiotics* 11.11 (Nov. 2022). Number: 11  
673 Publisher: Multidisciplinary Digital Publishing Institute, p. 1593. ISSN: 2079-6382. DOI: 10.  
674 3390/antibiotics11111593. URL: [https://www.mdpi.com/2079-6382/11/  
675 11/1593](https://www.mdpi.com/2079-6382/11/11/1593) (visited on 06/06/2023).
- 676 [46] Rahat Zaheer et al. “Comparative diversity of microbiomes and Resistomes in beef feedlots,  
677 downstream environments and urban sewage influent”. In: *BMC Microbiology* 19.1 (Aug. 2019),  
678 p. 197. ISSN: 1471-2180. DOI: 10.1186/s12866-019-1548-x. URL: [https://doi.  
679 org/10.1186/s12866-019-1548-x](https://doi.org/10.1186/s12866-019-1548-x) (visited on 10/13/2022).
- 680 [47] Rahat Zaheer et al. “Impact of sequencing depth on the characterization of the microbiome and  
681 resistome”. en. In: *Scientific Reports* 8.1 (Apr. 2018). Number: 1 Publisher: Nature Publishing  
682 Group, p. 5890. ISSN: 2045-2322. DOI: 10.1038/s41598-018-24280-8. URL: [https://www.nature.com/articles/s41598-018-24280-8  
683 /https://www.nature.com/articles/s41598-018-24280-8](https://www.nature.com/articles/s41598-018-24280-8) (visited on 01/20/2023).
- 684 [48] Yang Zhou et al. “Antibiotic Administration Routes and Oral Exposure to Antibiotic Resistant  
685 Bacteria as Key Drivers for Gut Microbiota Disruption and Resistome in Poultry”. eng. In: *Frontiers  
686 in Microbiology* 11 (2020), p. 1319. ISSN: 1664-302X. DOI: 10.3389/fmicb.2020.01319.
